# Supplementary material for: Early identification of disease progression in ALK-rearranged lung cancer using circulating tumor DNA analysis
Source: PubMed Central journal article supplement (PMC8651695; doi:10.1038/s41698-021-00239-3), 2021-12-07
Supplement: 41698_2021_239_MOESM1_ESM.pdf [file 41698_2021_239_MOESM1_ESM.pdf]

**Early identification of disease progression in *ALK*-rearranged lung cancer using circulating tumor DNA analysis**

**Supplementary Information**

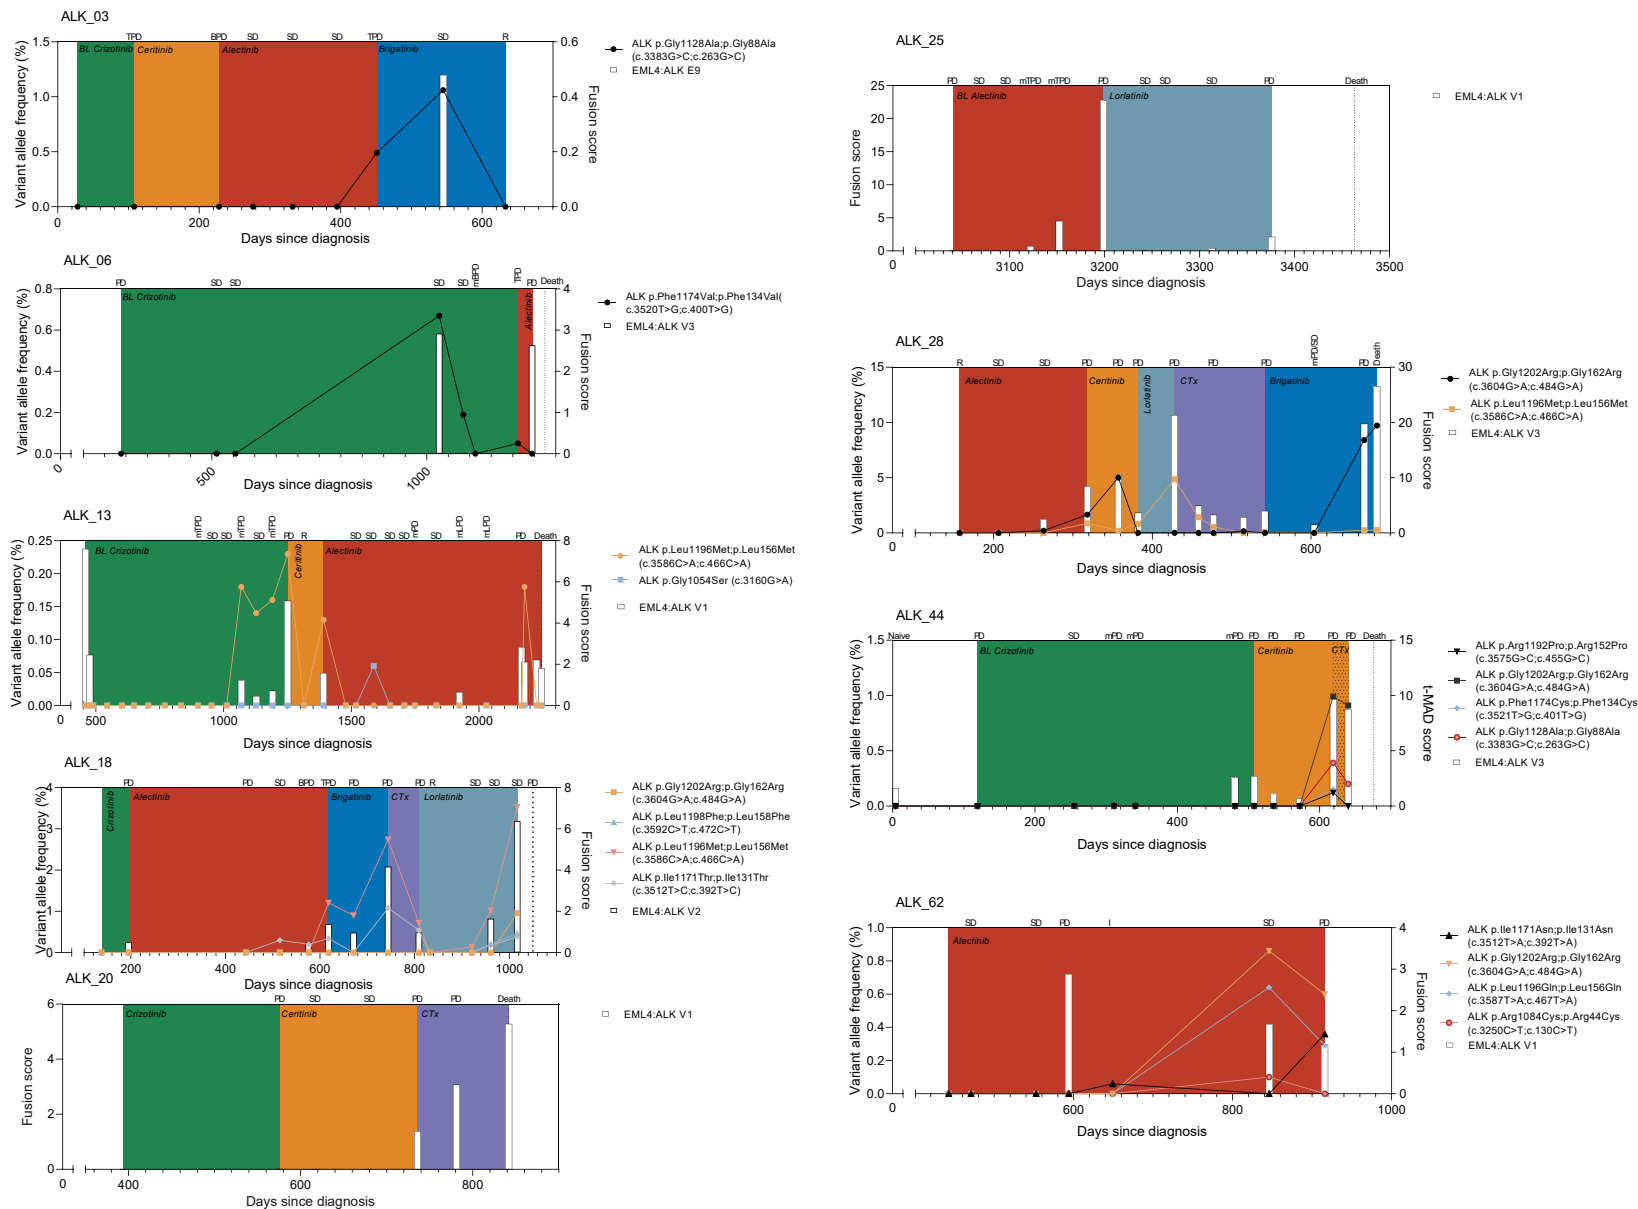

**Supplementary figure 1.** ctDNA kinetics of representative patients showing the concordance of *ALK* alterations with clinical course across therapy lines. Only *ALK* alterations are shown here for clarity. PD: progressive disease. SD: stable disease. BPD: brain PD. mBPD: mild BPD. TPD: thoracic PD. mTPD: mild TPD. R: response. I: improvement. CTx: chemotherapy.

Supplementary Table 1. *ALK* mutations and rearrangements determined from targeted NGS of ctDNA.

| Patient | Fusion detected | Mutations detected       |                          |                                                     |                               |
|---------|-----------------|--------------------------|--------------------------|-----------------------------------------------------|-------------------------------|
|         |                 | Nomenclature             |                          | Clinical relevance                                  | Reference (DOI)               |
| ALK_03  | EML4;ALK        | p.Gly1128Ala;p.Gly88Ala  | ALK c.3383G>C;c.263G>C   | known resistance mutation                           | 10.1016/j.lungcan.2018.07.004 |
| ALK_04  | ND              | p.Ser631Ile              | ALK c.1892G>T            | predicted pathogenic (probable resistance mutation) | 10.1093/nar/gky1015           |
| ALK_05  | EML4;ALK        | ND                       | ND                       |                                                     |                               |
| ALK_06  | EML4;ALK        | p.Phe1174Val;p.Phe134Val | ALK c.3520T>G;c.400T>G   | known resistance mutation                           | 10.1097/JTO.0000000000000094  |
| ALK_08  | EML4;ALK        | ND                       | ND                       |                                                     |                               |
| ALK_12  | ND              | p.Gly1269Ala;p.Gly229Ala | ALK c.3806G>C;c.686G>C   | known resistance mutation                           | 10.1158/2159-8290.CD-16-0596  |
| ALK_12  |                 | p.Phe1174Leu;p.Phe134Leu | ALK c.3522C>G;c.402C>G   | known resistance mutation                           | 10.1158/2159-8290.CD-16-0596  |
| ALK_12  |                 | p.Phe1174Leu;p.Phe134Leu | ALK c.3522C>A;c.402C>A   | known resistance mutation                           | 10.1158/2159-8290.CD-16-0596  |
| ALK_12  |                 | p.Phe1174Cys;p.Phe134Cys | ALK c.3521T>G;c.401T>G   | known resistance mutation                           | 10.1158/2159-8290.CD-16-0596  |
| ALK_12  |                 | p.Phe1174Val;p.Phe134Val | ALK c.3520T>G;c.400T>G   | known resistance mutation                           | 10.1158/2159-8290.CD-16-0596  |
| ALK_12  |                 | p.Phe1174Leu;p.Phe134Leu | ALK c.3520T>C;c.400T>C   | known resistance mutation                           | 10.1158/2159-8290.CD-16-0596  |
| ALK_12  |                 | p.Ile1171Thr;p.Ile131Thr | ALK c.3512T>C;c.392T>C   | known resistance mutation                           | 10.1158/2159-8290.CD-16-0596  |
| ALK_12  |                 | p.Leu1204Leu;p.Leu164Leu | ALK c.3612C>G;c.492C>G   | silent mutation                                     |                               |
| ALK_12  |                 | p.Arg1192Pro;p.Arg152Pro | ALK c.3575G>C;c.455G>C   | known resistance mutation                           | 10.18632/oncotarget.8173      |
| ALK_12  |                 | p.Gly1269Ala;p.Gly229Ala | ALK c.3806G>C;c.686G>C   | known resistance mutation                           | 10.1111/1759-7714.13299       |
| ALK_13  |                 | EML4;ALK                 | p.Leu1196Met;p.Leu156Met | ALK c.3586C>A;c.466C>A                              | known resistance mutation     |
| ALK_13  | p.Gly1054Ser    |                          | ALK c.3160G>A            | predicted pathogenic (probable resistance mutation) | 10.1093/nar/gky1015           |
| ALK_16  | EML4;ALK        | ND                       | ND                       |                                                     |                               |
| ALK_18  | EML4;ALK        | p.Gly1202Arg;p.Gly162Arg | ALK c.3604G>A;c.484G>A   | known resistance mutation                           | 10.1158/2159-8290.CD-16-0596  |
| ALK_18  |                 | p.Leu1198Phe;p.Leu158Phe | ALK c.3592C>T;c.472C>T   | known resistance mutation                           | 10.1056/NEJMoa1508887         |
| ALK_18  |                 | p.Leu1196Met;p.Leu156Met | ALK c.3586C>A;c.466C>A   | known resistance mutation                           | 10.1158/2159-8290.CD-16-0596  |
| ALK_18  |                 | p.Ile1171Thr;p.Ile131Thr | ALK c.3512T>C;c.392T>C   | known resistance mutation                           | 10.1158/2159-8290.CD-16-0596  |
| ALK_20  | EML4;ALK        | ND                       | ND                       |                                                     |                               |
| ALK_21  | ND              | p.Leu1044Leu             | ALK c.3132C>T            | silent mutation                                     |                               |
| ALK_21  |                 | p.Gly1269Ala;p.Gly229Ala | ALK c.3806G>C;c.686G>C   | known resistance mutation                           | 10.1158/2159-8290.CD-16-0596  |
| ALK_25  | EML4;ALK        | ND                       | ND                       |                                                     |                               |
| ALK_28  | EML4;ALK        | p.Gly1202Arg;p.Gly162Arg | ALK c.3604G>A;c.484G>A   | known resistance mutation                           | 10.1158/2159-8290.CD-16-0596  |
| ALK_28  |                 | p.Leu1196Met;p.Leu156Met | ALK c.3586C>A;c.466C>A   | known resistance mutation                           | 10.1158/2159-8290.CD-16-0596  |

|                |                          |                          |                        |                                                     |                               |
|----------------|--------------------------|--------------------------|------------------------|-----------------------------------------------------|-------------------------------|
| <b>ALK_30</b>  | ND                       | p.Gly1202Arg;p.Gly162Arg | ALK c.3604G>A;c.484G>A | known resistance mutation                           | 10.1158/2159-8290.CD-16-0596  |
| <b>ALK_32</b>  | EML4;ALK                 | ND                       | ND                     |                                                     |                               |
| <b>ALK_40</b>  | EML4;ALK<br>RAD51AP2;ALK | ND                       | ND                     |                                                     |                               |
| <b>ALK_44</b>  | EML4;ALK                 | p.Gly1202Arg;p.Gly162Arg | ALK c.3604G>A;c.484G>A | known resistance mutation                           | 10.1158/2159-8290.CD-16-0596  |
| <b>ALK_44</b>  |                          | p.Arg1192Pro;p.Arg152Pro | ALK c.3575G>C;c.455G>C | known resistance mutation                           | 10.18632/oncotarget.8173      |
| <b>ALK_44</b>  |                          | p.Phe1174Cys;p.Phe134Cys | ALK c.3521T>G;c.401T>G | known resistance mutation                           | 10.1158/2159-8290.CD-16-0596  |
| <b>ALK_44</b>  |                          | p.Gly1128Ala;p.Gly88Ala  | ALK c.3383G>C;c.263G>C | known resistance mutation                           | 10.1016/j.lungcan.2018.07.004 |
| <b>ALK_101</b> | ND                       | p.Gly1269Ala;p.Gly229Ala | ALK c.3806G>C;c.686G>C | known resistance mutation                           | 10.1158/2159-8290.CD-16-0596  |
| <b>ALK_101</b> |                          | p.Gly1202Arg;p.Gly162Arg | ALK c.3604G>A;c.484G>A | known resistance mutation                           | 10.1158/2159-8290.CD-16-0596  |
| <b>ALK_48</b>  | EML4;ALK                 | ND                       | ND                     |                                                     |                               |
| <b>ALK_56</b>  | EML4;ALK                 | p.Leu1196Met;p.Leu156Met | ALK c.3586C>A;c.466C>A | known resistance mutation                           | 10.1158/2159-8290.CD-16-0596  |
| <b>ALK_62</b>  | EML4;ALK                 | p.Ile1171Asn;p.Ile131Asn | ALK c.3512T>A;c.392T>A | known resistance mutation                           | 10.1158/2159-8290.CD-16-0596  |
| <b>ALK_62</b>  |                          | p.Gly1202Arg;p.Gly162Arg | ALK c.3604G>A;c.484G>A | known resistance mutation                           | 10.1158/2159-8290.CD-16-0596  |
| <b>ALK_62</b>  |                          | p.Leu1196Gln;p.Leu156Gln | ALK c.3587T>A;c.467T>A | known resistance mutation                           | 10.1158/1541-7786.MCR-12-0569 |
| <b>ALK_62</b>  |                          | p.Arg1084Cys;p.Arg44Cys  | ALK c.3250C>T;c.130C>T | predicted pathogenic (probable resistance mutation) | doi.org/10.1093/nar/gky1015   |
| <b>ALK_104</b> | ND                       | p.Gly893Arg              | ALK c.2677G>A          | predicted pathogenic (probable resistance mutation) | doi.org/10.1093/nar/gky1015   |

ND: not detectable

Supplementary table 2. Genetic alterations emergent\* at disease progression.

| Alteration             | Patient | VAf at PD† | Therapy line | Protein change           | Short-hand |
|------------------------|---------|------------|--------------|--------------------------|------------|
| ALK c.1892G>T          | ALK_04  | 0.11%      | Ceritinib    | p.Ser631Ile              | S631I      |
| ALK c.3250C>T;c.130C>T | ALK_62  | 0.10%      | Alectinib    | p.Arg1084Cys;p.Arg44Cys  | R1084C     |
| ALK c.3383G>C;c.263G>C | ALK_03  | 0.49%      | Alectinib    | p.Gly1128Ala;p.Gly88Ala  | G1128A     |
| ALK c.3383G>C;c.263G>C | ALK_44  | 0.39%      | Ceritinib    | p.Gly1128Ala;p.Gly88Ala  | G1128A     |
| ALK c.3512T>A;c.392T>A | ALK_62  | 0.36%      | Alectinib    | p.Ile1171Asn;p.Ile131Asn | I1171N     |
| ALK c.3512T>C;c.392T>C | ALK_12  | 0.03%      | Crizotinib   | p.Ile1171Thr;p.Ile131Thr | I1171T     |
| ALK c.3520T>C;c.400T>C | ALK_12  | 0.05%      | Crizotinib   | p.Phe1174Leu;p.Phe134Leu | F1174L     |
| ALK c.3520T>G;c.400T>G | ALK_12  | 0.02%      | Crizotinib   | p.Phe1174Val;p.Phe134Val | F1174V     |
| ALK c.3521T>G;c.401T>G | ALK_12  | 0.08%      | Crizotinib   | p.Phe1174Cys;p.Phe134Cys | F1174C     |
| ALK c.3521T>G;c.401T>G | ALK_44  | 0.15%      | Ceritinib    | p.Phe1174Cys;p.Phe134Cys | F1174C     |
| ALK c.3522C>A;c.402C>A | ALK_12  | 0.24%      | Crizotinib   | p.Phe1174Leu;p.Phe134Leu | F1174L     |
| ALK c.3522C>G;c.402C>G | ALK_12  | 0.88%      | Crizotinib   | p.Phe1174Leu;p.Phe134Leu | F1174L     |
| ALK c.3575G>C;c.455G>C | ALK_12  | 0.03%      | Crizotinib   | p.Arg1192Pro;p.Arg152Pro | R1192P     |
| ALK c.3575G>C;c.455G>C | ALK_44  | 0.12%      | Ceritinib    | p.Arg1192Pro;p.Arg152Pro | R1192P     |
| ALK c.3586C>A;c.466C>A | ALK_13  | 0.18%      | Crizotinib   | p.Leu1196Met;p.Leu156Met | L1196M     |
| ALK c.3586C>A;c.466C>A | ALK_13  | 0.18%      | Alectinib    | p.Leu1196Met;p.Leu156Met | L1196M     |
| ALK c.3586C>A;c.466C>A | ALK_18  | 1.21%      | Alectinib    | p.Leu1196Met;p.Leu156Met | L1196M     |
| ALK c.3586C>A;c.466C>A | ALK_28  | 0.87%      | Alectinib    | p.Leu1196Met;p.Leu156Met | L1196M     |
| ALK c.3586C>A;c.466C>A | ALK_13  | 0.13%      | Ceritinib    | p.Leu1196Met;p.Leu156Met | L1196M     |
| ALK c.3604G>A;c.484G>A | ALK_28  | 8.41%      | Alectinib    | p.Gly1202Arg;p.Gly162Arg | G1202R     |
| ALK c.3604G>A;c.484G>A | ALK_44  | 0.99%      | Ceritinib    | p.Gly1202Arg;p.Gly162Arg | G1202R     |
| ALK c.3604G>A;c.484G>A | ALK_28  | 8.41%      | Brigatinib   | p.Gly1202Arg;p.Gly162Arg | G1202R     |
| ALK c.3612C>G;c.492C>G | ALK_12  | 0.06%      | Crizotinib   | p.Leu1204Leu;p.Leu164Leu | L1204L     |
| ALK c.3806G>C;c.686G>C | ALK_12  | 0.43%      | Crizotinib   | p.Gly1269Ala;p.Gly229Ala | G1269A     |
| ALK;EML4 fusion        | ALK_18  | 0.50752688 | Crizotinib   |                          |            |
| ALK;EML4 fusion        | ALK_44  | 2.44638927 | Crizotinib   |                          |            |

|                                                                             |        |                             |            |                                                                                                      |       |
|-----------------------------------------------------------------------------|--------|-----------------------------|------------|------------------------------------------------------------------------------------------------------|-------|
| <b>ALK;EML4 fusion</b>                                                      | ALK_13 | 2.23385                     | Alectinib  |                                                                                                      |       |
| <b>ALK;EML4 fusion</b>                                                      | ALK_18 | 0.50770308                  | Alectinib  |                                                                                                      |       |
| <b>ALK;EML4 fusion</b>                                                      | ALK_25 | 0.7276359                   | Alectinib  |                                                                                                      |       |
| <b>ALK;EML4 fusion</b>                                                      | ALK_62 | 2.88461539                  | Alectinib  |                                                                                                      |       |
| <b>ALK;EML4 fusion</b>                                                      | ALK_13 | 1.57927                     | Ceritinib  |                                                                                                      |       |
| <b>ALK;EML4 fusion</b>                                                      | ALK_20 | 1.38                        | Ceritinib  |                                                                                                      |       |
| <b>ALK;EML4 fusion</b>                                                      | ALK_06 | 2.632088                    | Alectinib  |                                                                                                      |       |
| <b>BRAF c.1405G&gt;C</b>                                                    | ALK_44 | 0.11%                       | Ceritinib  | p.Gly469Arg                                                                                          | G469R |
| <b>EGFR CNV</b>                                                             | ALK_05 | 8.83                        | Crizotinib |                                                                                                      |       |
| <b>EGFR CNV</b>                                                             | ALK_13 | 4.544                       | Crizotinib |                                                                                                      |       |
| <b>EGFR CNV</b>                                                             | ALK_44 | 3.39224386                  | Crizotinib |                                                                                                      |       |
| <b>EGFR CNV</b>                                                             | ALK_13 | 3.03324366                  | Alectinib  |                                                                                                      |       |
| <b>EGFR CNV</b>                                                             | ALK_25 | 3.85624385                  | Alectinib  |                                                                                                      |       |
| <b>EGFR CNV</b>                                                             | ALK_62 | 6.879243851;<br>0.541243732 | Alectinib  |                                                                                                      |       |
| <b>EGFR CNV</b>                                                             | ALK_28 | 8.15124                     | Brigatinib |                                                                                                      |       |
| <b>EGFR CNV</b>                                                             | ALK_30 | 4.30911446                  | Brigatinib |                                                                                                      |       |
| <b>EGFR CNV</b>                                                             | ALK_28 | 0.96424                     | Lorlatinib |                                                                                                      |       |
| <b>ERBB2 c.1218C&gt;T;c.1173C&gt;T</b>                                      | ALK_13 | 0.20%                       | Alectinib  | p.Ile406Ile;p.Ile406Ile;p.Ile391Ile                                                                  | I406= |
| <b>ERBB2<br/>c.1976T&gt;A;c.1976T&gt;A;c.1931T&gt;A</b>                     | ALK_27 | 0.61%                       | Alectinib  | p.Val659Asp;p.Val659Asp;p.Val644Asp                                                                  | V659D |
| <b>ERBB2<br/>c.2313_2324dupATACGTGATGGC;<br/>c.2268_2279dupATACGTGATGGC</b> | ALK_13 | 1.20%                       | Crizotinib | p.Ala775_Gly776insTyrValMetAla;<br>p.Ala775_Gly776insTyrValMetAla;<br>p.Ala760_Gly761insTyrValMetAla |       |
| <b>KRAS c.436G&gt;A</b>                                                     | ALK_12 | 0.16%                       | Crizotinib | p.Ala146Thr;p.Ala146Thr                                                                              | A146T |
| <b>KRAS c.436G&gt;C</b>                                                     | ALK_10 | 0.07%                       | Crizotinib | p.Ala146Pro;p.Ala146Pro                                                                              | A146P |
| <b>MET c.1690G&gt;A</b>                                                     | ALK_21 | 0.28%                       | Alectinib  | p.Ala564Thr;p.Ala564Thr;p.Ala564Thr                                                                  | A564T |
| <b>MET c.1690G&gt;A</b>                                                     | ALK_05 | 0.09%                       | Crizotinib | p.Ala564Thr;p.Ala564Thr;p.Ala564Thr                                                                  | A564T |

|                                                                           |        |            |            |                                                             |        |
|---------------------------------------------------------------------------|--------|------------|------------|-------------------------------------------------------------|--------|
| <b>MET c.3743A&gt;G;c.3689A&gt;G</b>                                      | ALK_05 | 0.02%      | Crizotinib | p.Tyr1248Cys;p.Tyr1230Cys                                   | Y1248C |
| <b>MET CNV</b>                                                            | ALK_05 | 7.78       | Crizotinib |                                                             |        |
| <b>MET CNV</b>                                                            | ALK_13 | 4.796      | Crizotinib |                                                             |        |
| <b>MET CNV</b>                                                            | ALK_18 | 0.29224363 | Crizotinib |                                                             |        |
| <b>MET CNV</b>                                                            | ALK_13 | 1.97511435 | Alectinib  |                                                             |        |
| <b>MET CNV</b>                                                            | ALK_25 | 2.7981143  | Alectinib  |                                                             |        |
| <b>MET CNV</b>                                                            | ALK_28 | 14.1251    | Brigatinib |                                                             |        |
| <b>MET CNV</b>                                                            | ALK_30 | 11.5672436 | Brigatinib |                                                             |        |
| <b>NRAS c.34G&gt;T</b>                                                    | ALK_44 | 0.03%      | Ceritinib  | p.Gly12Cys                                                  | G12C   |
| <b>NRAS c.38G&gt;T</b>                                                    | ALK_20 | 0.03%      | CTx        | p.Gly13Val                                                  | G13V   |
| <b>RET c.1907C&gt;T;c.1907C&gt;T</b>                                      | ALK_35 | 0.12%      | Crizotinib | p.Thr636Met;p.Thr636Met                                     | T636M  |
| <b>TP53 c.374C&gt;G</b>                                                   | ALK_20 | 1%         | Ceritinib  | p.Thr125Arg;p.Thr125Arg;p.Thr125Arg;p.Thr125Arg             | T125R  |
| <b>TP53 c.581T&gt;C;c.548T&gt;C</b>                                       | ALK_05 | 0.18%      | Crizotinib | p.Leu194Pro;p.Leu194Pro;p.Leu194Pro;p.Leu194Pro;p.Leu183Pro | L194P  |
| <b>TP53 c.586C&gt;T;c.553C&gt;T</b>                                       | ALK_13 | 2.02%      | Alectinib  | p.Arg196*;p.Arg196*;p.Arg196*;p.Arg196*;p.Arg185*           | R196*  |
| <b>TP53 c.641A&gt;G;c.608A&gt;G</b>                                       | ALK_13 | 0.07%      | Ceritinib  | p.His214Arg;p.His214Arg;p.His214Arg;p.His214Arg;p.His203Arg | H214R  |
| <b>TP53 c.659A&gt;G;c.626A&gt;G</b>                                       | ALK_56 | 1.92%      | Alectinib  | p.Tyr220Cys;p.Tyr220Cys;p.Tyr220Cys;p.Tyr220Cys;p.Tyr209Cys | Y220C  |
| <b>TP53 c.715A&gt;G;c.682A&gt;G</b>                                       | ALK_20 | 0.12%      | Crizotinib | p.Asn239Asp;p.Asn239Asp;p.Asn239Asp;p.Asn239Asp;p.Asn228Asp | N239D  |
| <b>TP53 c.722C&gt;G;c.689C&gt;G</b>                                       | ALK_03 | 0.17%      | Alectinib  | p.Ser241Cys;p.Ser241Cys;p.Ser241Cys;p.Ser241Cys;p.Ser230Cys | S241C  |
| <b>TP53 c.730G&gt;T;c.697G&gt;T</b>                                       | ALK_03 | 0.10%      | Crizotinib | p.Gly244Cys;p.Gly244Cys;p.Gly244Cys;p.Gly244Cys;p.Gly233Cys | G244C  |
| <b>TP53 c.818G&gt;T;c.785G&gt;T</b>                                       | ALK_56 | 0.19%      | Alectinib  | p.Arg273Leu;p.Arg273Leu;p.Arg273Leu;p.Arg262Leu             | R273L  |
| <b>TP53 c.920-2A&gt;G;c.887-2A&gt;G</b>                                   | ALK_28 | 5.19%      | Alectinib  | N/A                                                         |        |
| <b>TP53 c.994-2A&gt;G;c.*101-2A&gt;G;<br/>c.*13-2A&gt;G;c.961-2A&gt;G</b> | ALK_20 | 0.30%      | CTx        | N/A                                                         |        |

\*Genetic alterations detected in samples collected at clinical progression points which were not detected in previous sampling points within the course of a therapy line.

†Fusion score was quantified as the number of paired reads spanning the fusion breakpoint divided by the median sequencing depth. The CNV score reported here is the output from the Avenio analysis pipeline, which is defined as a statistical summary of a called amplification accounting the log2ratio to normal copy number.

Supplementary table 3. Genes included in the targeted sequencing panels.

| <b>Gene</b>   | <b>Exon</b>                           | <b>SNV</b> | <b>Indel</b> | <b>Fusion</b> | <b>CNV</b> |
|---------------|---------------------------------------|------------|--------------|---------------|------------|
| <i>ALK</i>    | 4, 12, 15, 20, 21, 22, 23, 24, 25, 28 | x          | x            | x             |            |
| <i>APC</i>    | 6, 7, 9, 12, 14, 16                   | x          | x            |               |            |
| <i>BRAF</i>   | 11, 15                                | x          | x            |               |            |
| <i>BRCA1</i>  | all                                   | x          |              |               |            |
| <i>BRCA2</i>  | all                                   | x          |              |               |            |
| <i>DPYD</i>   | all                                   | x          |              |               |            |
| <i>EGFR</i>   | all                                   | x          | x            |               | x          |
| <i>ERBB2</i>  | all                                   | x          | x            |               | x          |
| <i>KIT</i>    | 8, 9, 11, 13, 14, 17                  | x          | x            |               |            |
| <i>KRAS</i>   | all                                   | x          |              |               |            |
| <i>MET</i>    | all                                   | x          | x            |               | x          |
| <i>NRAS</i>   | 2, 3                                  | x          |              |               |            |
| <i>PDGFRA</i> | 11, 12, 14, 15, 16, 18                | x          |              |               |            |
| <i>RET</i>    | 11, 16                                | x          |              | x             |            |
| <i>ROS1</i>   | 38                                    | x          |              | x             |            |
| <i>TP53</i>   | all                                   | x          | x            |               |            |



Supplementary table 4. % $\Delta$ t-MAD used for ROC analyses.

| ALK_ID | % $\Delta$ t-MAD | Clinical status |
|--------|------------------|-----------------|
| ALK_03 | 25%              | PDTC            |
| ALK_03 | 157%             | PDTC            |
| ALK_03 | -62%             | SD              |
| ALK_03 | -1%              | SD              |
| ALK_03 | -15%             | SD              |
| ALK_03 | 197%             | PDTC            |
| ALK_03 | -26%             | SD              |
| ALK_03 | -34%             | SD              |
| ALK_04 | -29%             | SD              |
| ALK_04 | 32%              | PDTC            |
| ALK_05 | -8%              | SD              |
| ALK_05 | -43%             | SD              |
| ALK_05 | 129%             | SD              |
| ALK_05 | -45%             | SD              |
| ALK_06 | 77%              | SD              |
| ALK_06 | 20%              | SD              |
| ALK_06 | 58%              | SD              |
| ALK_06 | -79%             | SD              |
| ALK_06 | 12%              | PDTC            |
| ALK_07 | -15%             | SD              |
| ALK_07 | 810%             | PDTC            |
| ALK_07 | -84%             | SD              |
| ALK_07 | -13%             | SD              |
| ALK_08 | 42%              | SD              |
| ALK_08 | -28%             | SD              |
| ALK_08 | -18%             | SD              |
| ALK_10 | -31%             | SD              |
| ALK_10 | -19%             | SD              |
| ALK_12 | 12%              | SD              |
| ALK_12 | -21%             | SD              |
| ALK_12 | 8%               | SD              |
| ALK_12 | 197%             | PDTC            |
| ALK_12 | -76%             | SD              |
| ALK_12 | 24%              | SD              |
| ALK_12 | 78%              | SD              |
| ALK_12 | 24%              | SD              |
| ALK_12 | -14%             | SD              |
| ALK_12 | 26%              | SD              |
| ALK_13 | -67%             | SD              |
| ALK_13 | 157%             | SD              |
| ALK_13 | 9%               | SD              |
| ALK_13 | -27%             | SD              |
| ALK_13 | -3%              | SD              |
| ALK_13 | 21%              | SD              |

|        |      |      |
|--------|------|------|
| ALK_13 | 93%  | SD   |
| ALK_13 | -8%  | SD   |
| ALK_13 | -21% | SD   |
| ALK_13 | 51%  | PDTC |
| ALK_13 | -64% | SD   |
| ALK_13 | 115% | SD   |
| ALK_13 | 16%  | SD   |
| ALK_13 | 2%   | SD   |
| ALK_13 | 39%  | SD   |
| ALK_13 | -50% | SD   |
| ALK_13 | 2%   | SD   |
| ALK_15 | 13%  | SD   |
| ALK_15 | 64%  | SD   |
| ALK_15 | 8%   | PDTC |
| ALK_15 | -26% | SD   |
| ALK_15 | 135% | SD   |
| ALK_15 | -18% | SD   |
| ALK_15 | -17% | SD   |
| ALK_16 | 45%  | PDTC |
| ALK_16 | -22% | SD   |
| ALK_18 | 155% | PDTC |
| ALK_18 | 0%   | SD   |
| ALK_18 | 257% | PDTC |
| ALK_18 | 145% | PDTC |
| ALK_18 | -61% | SD   |
| ALK_18 | 25%  | SD   |
| ALK_18 | 13%  | SD   |
| ALK_18 | 791% | SD   |
| ALK_20 | 3%   | PDTC |
| ALK_20 | -25% | SD   |
| ALK_20 | 49%  | SD   |
| ALK_21 | 9%   | SD   |
| ALK_21 | 57%  | PDTC |
| ALK_21 | 24%  | PDTC |
| ALK_22 | 44%  | SD   |
| ALK_22 | 0%   | SD   |
| ALK_23 | 45%  | SD   |
| ALK_23 | 1%   | SD   |
| ALK_23 | 19%  | SD   |
| ALK_23 | -21% | SD   |
| ALK_23 | 50%  | SD   |
| ALK_23 | -23% | SD   |
| ALK_24 | -15% | SD   |
| ALK_24 | 15%  | SD   |
| ALK_24 | 64%  | SD   |
| ALK_24 | -16% | SD   |
| ALK_24 | 28%  | SD   |

|        |      |      |
|--------|------|------|
| ALK_24 | -5%  | SD   |
| ALK_24 | -3%  | SD   |
| ALK_24 | -8%  | SD   |
| ALK_25 | 39%  | SD   |
| ALK_25 | -19% | SD   |
| ALK_25 | 99%  | PDTC |
| ALK_25 | -51% | SD   |
| ALK_25 | 34%  | SD   |
| ALK_25 | -29% | SD   |
| ALK_26 | 40%  | SD   |
| ALK_26 | 98%  | SD   |
| ALK_26 | -54% | SD   |
| ALK_26 | 77%  | SD   |
| ALK_26 | -29% | SD   |
| ALK_27 | 37%  | PDTC |
| ALK_27 | -44% | SD   |
| ALK_27 | -29% | SD   |
| ALK_27 | -25% | SD   |
| ALK_27 | 13%  | SD   |
| ALK_28 | -22% | SD   |
| ALK_28 | 13%  | SD   |
| ALK_28 | 436% | PDTC |
| ALK_28 | 609% | PDTC |
| ALK_28 | 11%  | PDTC |
| ALK_28 | 17%  | PDTC |
| ALK_29 | -9%  | SD   |
| ALK_29 | 34%  | SD   |
| ALK_30 | 23%  | SD   |
| ALK_30 | 300% | SD   |
| ALK_30 | -89% | SD   |
| ALK_30 | 514% | PDTC |
| ALK_30 | -29% | SD   |
| ALK_30 | -18% | SD   |
| ALK_30 | 33%  | SD   |
| ALK_30 | 19%  | SD   |
| ALK_30 | 12%  | PDTC |
| ALK_30 | 764% | PDTC |
| ALK_30 | 2%   | PDTC |
| ALK_31 | 28%  | SD   |
| ALK_32 | -51% | SD   |
| ALK_32 | 8%   | PDTC |
| ALK_32 | 21%  | SD   |
| ALK_32 | -61% | SD   |
| ALK_34 | 19%  | SD   |
| ALK_34 | -12% | SD   |
| ALK_34 | 131% | SD   |
| ALK_34 | -3%  | SD   |

|         |      |      |
|---------|------|------|
| ALK_35  | -8%  | SD   |
| ALK_35  | 67%  | PDTC |
| ALK_35  | -30% | SD   |
| ALK_37  | 46%  | SD   |
| ALK_37  | 2%   | PDTC |
| ALK_37  | 69%  | SD   |
| ALK_39  | -3%  | SD   |
| ALK_39  | 18%  | SD   |
| ALK_39  | -9%  | SD   |
| ALK_40  | -19% | SD   |
| ALK_40  | -44% | SD   |
| ALK_40  | 19%  | SD   |
| ALK_43  | 2%   | SD   |
| ALK_43  | 61%  | PDTC |
| ALK_43  | -55% | SD   |
| ALK_43  | 109% | SD   |
| ALK_43  | 34%  | SD   |
| ALK_44  | 11%  | SD   |
| ALK_44  | 1%   | PDTC |
| ALK_44  | 267% | PDTC |
| ALK_48  | 36%  | SD   |
| ALK_48  | 41%  | SD   |
| ALK_56  | 89%  | SD   |
| ALK_56  | 91%  | PDTC |
| ALK_56  | -67% | SD   |
| ALK_56  | -64% | SD   |
| ALK_57  | -40% | SD   |
| ALK_59  | 9%   | SD   |
| ALK_60  | -35% | SD   |
| ALK_62  | 23%  | SD   |
| ALK_62  | -45% | SD   |
| ALK_62  | -85% | SD   |
| ALK_62  | 131% | SD   |
| ALK_66  | 34%  | SD   |
| ALK_66  | -44% | SD   |
| ALK_66  | 58%  | SD   |
| ALK_101 | 34%  | PDTC |
| ALK_101 | 144% | SD   |
| ALK_101 | -47% | SD   |
| ALK_102 | -18% | SD   |
| ALK_104 | 92%  | SD   |
| ALK_104 | -20% | SD   |
| ALK_104 | -19% | SD   |
| ALK_105 | 27%  | SD   |
| ALK_105 | 40%  | PDTC |
| ALK_105 | 5%   | SD   |

SD: stable disease; PD: progressive disease; PDTC: progressive disease with therapy change

Supplementary table 5.  $\Delta VAF_{\text{mean}}$  used for ROC analyses.

| ALK_ID | $\Delta VAF_{\text{mean}}$ | Clinical status |
|--------|----------------------------|-----------------|
| ALK_03 | 0.10%                      | PDTC            |
| ALK_03 | -0.10%                     | PDTC            |
| ALK_03 | 0.00%                      | SD              |
| ALK_03 | 0.00%                      | SD              |
| ALK_03 | 0.22%                      | SD              |
| ALK_03 | 0.11%                      | PDTC            |
| ALK_03 | 0.06%                      | SD              |
| ALK_03 | -0.39%                     | SD              |
| ALK_04 | 0.14%                      | SD              |
| ALK_04 | 0.05%                      | PDTC            |
| ALK_05 | -0.05%                     | SD              |
| ALK_06 | 0.00%                      | SD              |
| ALK_06 | 0.00%                      | SD              |
| ALK_06 | 0.34%                      | SD              |
| ALK_06 | -0.15%                     | SD              |
| ALK_06 | -0.08%                     | PDTC            |
| ALK_07 | 0.54%                      | SD              |
| ALK_07 | -0.15%                     | PDTC            |
| ALK_07 | 0.30%                      | SD              |
| ALK_07 | -0.13%                     | SD              |
| ALK_08 | 0.21%                      | SD              |
| ALK_08 | -0.21%                     | SD              |
| ALK_08 | 0.00%                      | SD              |
| ALK_10 | 0.00%                      | SD              |
| ALK_10 | -0.07%                     | SD              |
| ALK_12 | -0.03%                     | SD              |
| ALK_12 | 0.02%                      | SD              |
| ALK_12 | 0.04%                      | SD              |
| ALK_12 | -0.10%                     | PDTC            |
| ALK_12 | 0.21%                      | SD              |
| ALK_12 | -0.13%                     | SD              |
| ALK_13 | 0.00%                      | SD              |
| ALK_13 | 0.00%                      | SD              |
| ALK_13 | 0.00%                      | SD              |
| ALK_13 | 0.00%                      | SD              |
| ALK_13 | 0.00%                      | SD              |
| ALK_13 | 0.00%                      | SD              |
| ALK_13 | 0.00%                      | SD              |
| ALK_13 | 0.00%                      | SD              |
| ALK_13 | -0.73%                     | SD              |
| ALK_13 | 2.38%                      | PDTC            |

|        |        |      |
|--------|--------|------|
| ALK_13 | -2.91% | SD   |
| ALK_13 | 0.59%  | SD   |
| ALK_13 | 0.18%  | SD   |
| ALK_13 | -0.10% | SD   |
| ALK_13 | -0.08% | SD   |
| ALK_13 | 0.00%  | SD   |
| ALK_13 | 0.26%  | SD   |
| ALK_15 | 0.00%  | SD   |
| ALK_15 | 0.00%  | SD   |
| ALK_15 | 0.17%  | PDTC |
| ALK_15 | -0.17% | SD   |
| ALK_15 | 0.00%  | SD   |
| ALK_15 | 0.00%  | SD   |
| ALK_15 | 0.00%  | SD   |
| ALK_16 | 0.00%  | PDTC |
| ALK_16 | 0.00%  | SD   |
| ALK_18 | 0.51%  | PDTC |
| ALK_18 | 0.00%  | SD   |
| ALK_18 | 0.79%  | PDTC |
| ALK_18 | 2.52%  | PDTC |
| ALK_18 | -0.85% | SD   |
| ALK_18 | 0.13%  | SD   |
| ALK_18 | 1.87%  | SD   |
| ALK_20 | -0.14% | PDTC |
| ALK_20 | 0.29%  | SD   |
| ALK_20 | -0.45% | SD   |
| ALK_21 | 0.00%  | SD   |
| ALK_21 | 0.11%  | PDTC |
| ALK_21 | 0.17%  | SD   |
| ALK_21 | 0.26%  | PDTC |
| ALK_23 | 0.00%  | SD   |
| ALK_23 | 0.00%  | SD   |
| ALK_23 | 0.00%  | SD   |
| ALK_23 | 0.14%  | SD   |
| ALK_23 | -0.14% | SD   |
| ALK_23 | 0.00%  | SD   |
| ALK_24 | 0.00%  | SD   |
| ALK_24 | 0.04%  | SD   |
| ALK_24 | -0.04% | SD   |
| ALK_24 | 0.00%  | SD   |
| ALK_24 | 0.05%  | SD   |
| ALK_24 | -0.05% | SD   |
| ALK_24 | 0.00%  | SD   |
| ALK_24 | 0.00%  | SD   |

|        |        |      |
|--------|--------|------|
| ALK_25 | -0.26% | SD   |
| ALK_25 | 0.52%  | SD   |
| ALK_25 | -0.04% | PDTC |
| ALK_25 | 0.57%  | SD   |
| ALK_25 | 0.11%  | SD   |
| ALK_26 | 0.00%  | SD   |
| ALK_26 | 0.02%  | SD   |
| ALK_26 | 0.10%  | SD   |
| ALK_26 | -0.12% | SD   |
| ALK_26 | 0.13%  | SD   |
| ALK_27 | 0.61%  | PDTC |
| ALK_27 | -0.55% | SD   |
| ALK_27 | -0.06% | SD   |
| ALK_27 | 0.00%  | SD   |
| ALK_27 | 0.00%  | SD   |
| ALK_28 | 0.00%  | SD   |
| ALK_28 | 0.11%  | SD   |
| ALK_28 | 1.83%  | PDTC |
| ALK_28 | 2.63%  | PDTC |
| ALK_28 | -0.67% | PDTC |
| ALK_28 | 0.18%  | PDTC |
| ALK_29 | 0.00%  | SD   |
| ALK_29 | 0.00%  | SD   |
| ALK_30 | 0.00%  | SD   |
| ALK_30 | 0.00%  | SD   |
| ALK_30 | 0.11%  | SD   |
| ALK_30 | -0.11% | PDTC |
| ALK_30 | 0.00%  | SD   |
| ALK_30 | 0.00%  | SD   |
| ALK_30 | 0.16%  | SD   |
| ALK_30 | 0.28%  | PDTC |
| ALK_30 | 4.77%  | PDTC |
| ALK_30 | 0.69%  | PDTC |
| ALK_31 | -0.16% | SD   |
| ALK_32 | 0.00%  | SD   |
| ALK_32 | 0.00%  | PDTC |
| ALK_32 | 0.04%  | SD   |
| ALK_32 | -0.04% | SD   |
| ALK_34 | -0.19% | SD   |
| ALK_34 | 0.43%  | SD   |
| ALK_34 | -0.21% | SD   |
| ALK_34 | -0.22% | SD   |
| ALK_35 | 0.00%  | SD   |

|         |        |      |
|---------|--------|------|
| ALK_35  | 0.00%  | PDTC |
| ALK_35  | 0.00%  | SD   |
| ALK_39  | 0.00%  | SD   |
| ALK_39  | 0.00%  | SD   |
| ALK_39  | 0.08%  | SD   |
| ALK_40  | 0.05%  | SD   |
| ALK_40  | 0.21%  | SD   |
| ALK_40  | 0.28%  | SD   |
| ALK_43  | 0.00%  | SD   |
| ALK_43  | 0.00%  | PDTC |
| ALK_43  | 0.00%  | SD   |
| ALK_43  | 0.20%  | SD   |
| ALK_43  | 0.00%  | SD   |
| ALK_44  | 0.00%  | SD   |
| ALK_44  | 0.09%  | PDTC |
| ALK_44  | 0.27%  | PDTC |
| ALK_48  | 0.00%  | SD   |
| ALK_48  | 0.00%  | SD   |
| ALK_56  | 0.13%  | SD   |
| ALK_56  | 2.61%  | PDTC |
| ALK_56  | -2.74% | SD   |
| ALK_56  | 0.10%  | SD   |
| ALK_62  | 0.03%  | SD   |
| ALK_62  | -0.03% | SD   |
| ALK_62  | -2.40% | SD   |
| ALK_101 | -0.14% | PDTC |
| ALK_101 | 2.60%  | SD   |
| ALK_101 | -2.11% | SD   |
| ALK_102 | 0.00%  | SD   |
| ALK_104 | -0.11% | SD   |
| ALK_104 | 0.36%  | SD   |
| ALK_104 | -0.29% | SD   |
| ALK_104 | 0.00%  | SD   |

SD: stable disease; PD: progressive disease; PDTC: progressive disease with therapy change
